# Supplementary material for: Heatstroke-induced late-onset neurological deficits in mice caused by white matter demyelination, Purkinje cell degeneration, and synaptic impairment in the cerebellum
Source: PubMed Central journal article supplement (PMC9217968; doi:10.1038/s41598-022-14849-9), 2022-06-22
Supplement: 41598_2022_14849_MOESM2_ESM.pdf [file 41598_2022_14849_MOESM2_ESM.pdf]

## **Supplementary Information**

### **Heatstroke-induced late-onset neurological deficits in mice caused by white matter demyelination, Purkinje cell degeneration, and synaptic impairment in the cerebellum**

Kazuyuki Miyamoto\*, Motoyasu Nakamura, Hirokazu Ohtaki, Keisuke Suzuki, Hiroki Yamaga, Kaoru Yanagisawa, Atsuo Maeda, Masaharu Yagi, Munetaka Hayashi, Kazuho Honda, Kenji Dohi

### **Figure S1 Head magnetic resonance imaging (MRI) image of patients with heatstroke**

Head MRI was performed 8 and 47 days after heatstroke. High signal intensity (arrow) was detected at the cerebellum on diffusion-weighted imaging 8 days after heatstroke, which diminished over time.

### **Figure S2 Experimental design**

Protocol of (a) behavior study (rotarod test) and (b) brain tissue sampling.

HS, heatstroke; CTL, control

## **Video S1**

### **Tandem gait examination of the patient with heatstroke**

Wobble during walk observed upon tandem gait examination.

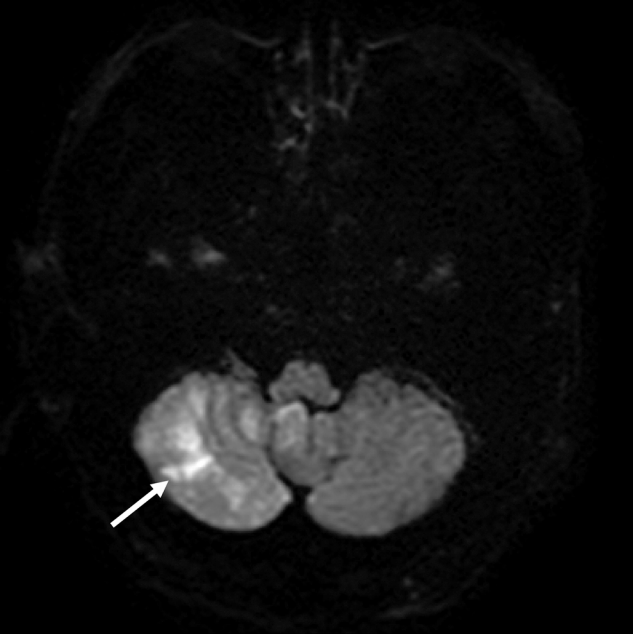

**Day 8**

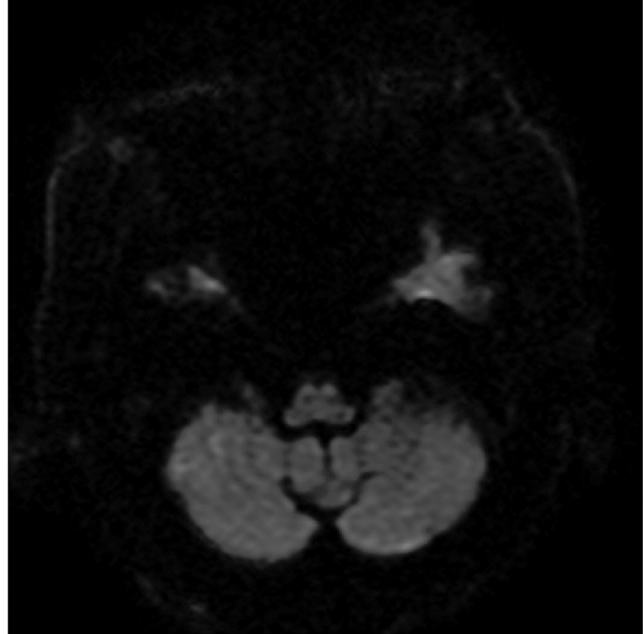

**Day 47**

**Supple Figure 1**

# Experimental design

a)

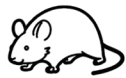

Control(CTL) n=36

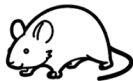

Heatstroke(HS) n=36

Heat Exposure

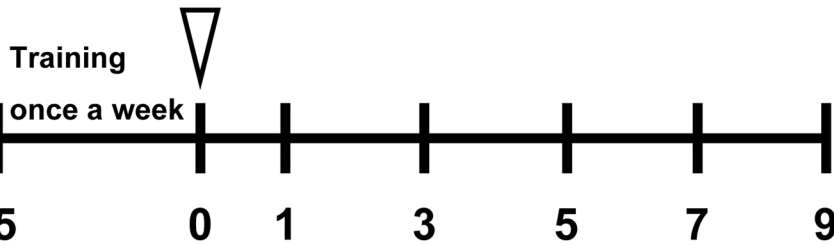

Rotarod + + + + + + + + + +

b)

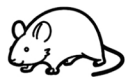

Control(CTL) n=9 per group

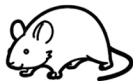

Heatstroke(HS) n=9 per group

Heat Exposure

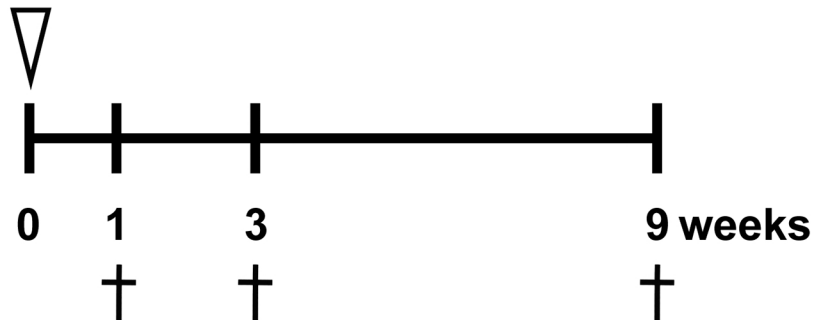

Brain samples were collected  
for histological examination
